# Supplementary material for: Development of a novel daily-scale compound dry and hot index and its application across non-arid regions of China
Source: Copernicus journal article supplement (doi:10.5194/hess-2022-217), 2022-09-09
Supplement: Supplementary file [file hess-2022-217-AC1-supplement.pdf]

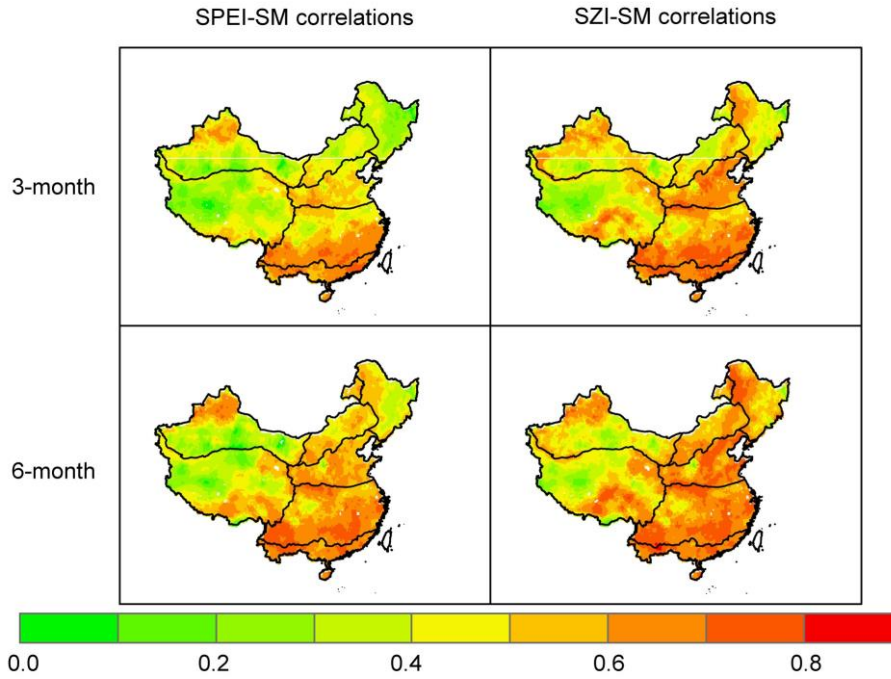

Figure R1 Correlations for SPEI-SM and SZI-SM at 3- and 6-month scales across China

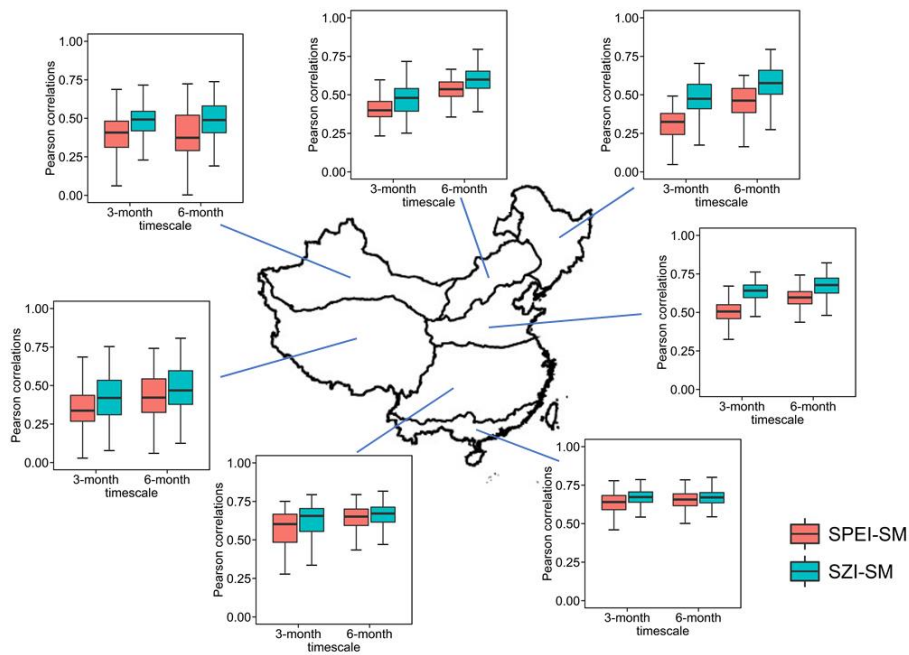

Figure R2 Boxplots of correlations for SPEI-SM and SZI-SM at 3- and 6-month scales at seven climatic regions of China
